# Supplementary material
Source: publisher figshare collection journal article supplement (https://future-science-group.figshare.com/ndownloader/files/29016696)
Supplement: Supplementary file 1 [file 29016696]

## Sheet: Notch signaling pathway
Table S1: The list of genes involve in Notch signaling pathway.
notch-pathway-gene	oncogene or TSG	notch-7-genes
THBS2	unknown
SPEN	TSG	1
SNW1	unknown
SKP1	unknown
SAP30	unknown
RFNG	unknown
RBX1	unknown
RBPJL	unknown
RBPJ	unknown
PSENEN	unknown
PSEN2	TSG
PSEN1	unknown
NUMBL	unknown
NUMB	unknown
NRARP	oncogene
NOV	TSG
NOTCH4	TSG
NOTCH3	TSG
NOTCH2	TSG	1
NOTCH1	TSG
NCSTN	unknown
NCOR2	TSG	1
NCOR1	TSG	1
MFNG	unknown
MFAP5	unknown
MFAP2	unknown
MAML3	TSG
MAML2	unknown
MAML1	unknown
LFNG	unknown
KDM5A	oncogene
KAT2B	TSG
JAG2	TSG
JAG1	unknown
ITCH	unknown
HEYL	TSG
HEY2	TSG
HEY1	TSG
HES5	TSG
HES4	TSG
HES3	TSG
HES2	TSG
HES1	TSG
HDAC2	unknown
HDAC1	oncogene
FHL1	unknown
FBXW7	TSG
EP300	TSG	1
EGFL7	unknown
DTX4	unknown
DTX3L	unknown
DTX3	unknown
DTX2	unknown
DTX1	unknown
DNER	TSG
DLL4	unknown
DLL3	unknown
DLL1	unknown
DLK1	unknown
CUL1	TSG
CTBP2	unknown
CTBP1	unknown
CREBBP	TSG	1
CNTN6	TSG	1
CNTN1	unknown
CIR1	unknown
ARRDC1	oncogene
APH1B	unknown
APH1A	unknown
ADAM17	unknown
ADAM10	unknown
